# Supplementary material for: Detecting and describing heterogeneity in health care cost trajectories among asylum seekers
Source: PubMed Central journal article supplement (PMC9339203; doi:10.1186/s12913-022-08346-y), 2022-07-30
Supplement: 12913_2022_8346_MOESM1_ESM.pdf [file 12913_2022_8346_MOESM1_ESM.pdf]

## Additional file 1

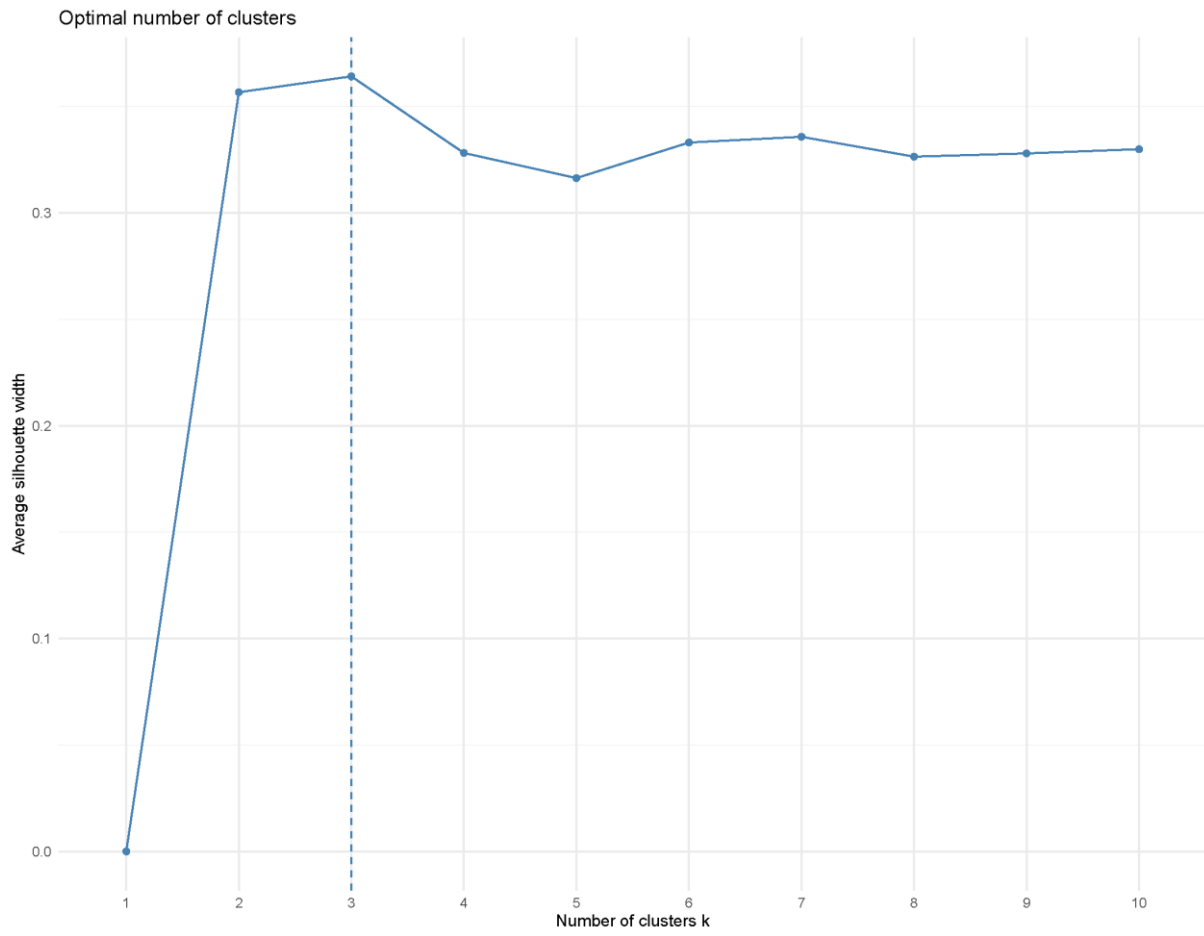

**Fig. S1** Silhouette width by number of clusters
