# Supplementary material for: Detecting and describing heterogeneity in health care cost trajectories among asylum seekers
Source: PubMed Central journal article supplement (PMC9339203; doi:10.1186/s12913-022-08346-y), 2022-07-30
Supplement: 12913_2022_8346_MOESM2_ESM.pdf [file 12913_2022_8346_MOESM2_ESM.pdf]

## Additional file 2

**Table S1** Descriptive statistics by cost category

|                                     | Monthly health care cost in CHF by cost category: |        |            |          |        |          |       |        |           |            |        |           |           |        |         |      |        |            |
|-------------------------------------|---------------------------------------------------|--------|------------|----------|--------|----------|-------|--------|-----------|------------|--------|-----------|-----------|--------|---------|------|--------|------------|
|                                     | Outpatient                                        |        |            | Hospital |        |          | Other |        |           | Medication |        |           | Emergency |        |         | USMi |        |            |
|                                     | Mean                                              | Median | IQR        | Mean     | Median | IQR      | Mean  | Median | IQR       | Mean       | Median | IQR       | Mean      | Median | IQR     | Mean | Median | IQR        |
| USMi visit 1 <sup>st</sup> month    | 263                                               | 120    | [34; 271]  | 151      | 0      | [0; 0]   | 198   | 60     | [5; 203]  | 56         | 17     | [3; 47]   | 41        | 3      | [0;54]  | 354  | 289    | [223; 401] |
| No USMi visit 1 <sup>st</sup> month | 147                                               | 66     | [16; 171]  | 92       | 0      | [0; 0]   | 117   | 31     | [0; 122]  | 31         | 9      | [0; 30]   | 32        | 0      | [0; 38] | 267  | 223    | [156; 334] |
| Asylum seeker                       | 189                                               | 80     | [22; 204]  | 116      | 0      | [0; 0]   | 148   | 43     | [3; 148]  | 40         | 12     | [1; 36]   | 35        | 0      | [0; 45] | 301  | 245    | [178; 356] |
| Emergency aid recipient             | 178                                               | 79     | [22; 236]  | 87       | 0      | [0; 0]   | 128   | 21     | [0; 124]  | 42         | 8      | [0; 35]   | 33        | 0      | [0; 39] | 271  | 223    | [134; 334] |
| Female                              | 263                                               | 159    | [60; 301]  | 148      | 0      | [0; 71]  | 223   | 91     | [24; 247] | 55         | 23     | [6; 53]   | 46        | 11     | [0; 60] | 339  | 267    | [178; 423] |
| Male                                | 153                                               | 56     | [10; 155]  | 96       | 0      | [0; 0]   | 110   | 23     | [0; 103]  | 33         | 8      | [0; 27]   | 30        | 0      | [0; 36] | 277  | 245    | [156; 334] |
| Age categories                      |                                                   |        |            |          |        |          |       |        |           |            |        |           |           |        |         |      |        |            |
| 20 to 24 years                      | 4                                                 | 0      | [0; 0]     | 2        | 0      | [0; 0]   | 6     | 0      | [0; 0]    | 1          | 0      | [0; 0]    | 1         | 0      | [0; 0]  | 276  | 245    | [156; 334] |
| 25 to 39 years                      | 191                                               | 97     | [42; 215]  | 134      | 0      | [0; 0]   | 149   | 55     | [14; 154] | 35         | 14     | [5; 35]   | 42        | 13     | [0; 56] | 294  | 245    | [178; 356] |
| 40 to 49 years                      | 289                                               | 152    | [63; 300]  | 134      | 0      | [0; 0]   | 219   | 82     | [25; 215] | 66         | 23     | [8; 57]   | 43        | 13     | [0; 52] | 301  | 267    | [156; 378] |
| 50 to 59 years                      | 357                                               | 186    | [109; 336] | 95       | 0      | [0; 0]   | 279   | 143    | [60;301]  | 84         | 40     | [19; 93]  | 40        | 5      | [0; 47] | 362  | 245    | [178; 423] |
| 60 and older                        | 440                                               | 268    | [171; 440] | 274      | 0      | [0; 117] | 324   | 136    | [67; 248] | 146        | 72     | [36; 133] | 63        | 31     | [0; 98] | 340  | 212    | [78; 456]  |
| Married                             | 272                                               | 146    | [65; 293]  | 143      | 0      | [0; 0]   | 196   | 82     | [26; 228] | 55         | 26     | [8; 61]   | 42        | 13     | [0; 56] | 297  | 245    | [156; 356] |
| Not married                         | 151                                               | 56     | [0; 165]   | 99       | 0      | [0; 0]   | 123   | 23     | [0; 111]  | 33         | 7      | [0; 26]   | 32        | 0      | [0; 37] | 297  | 245    | [178; 356] |
| Region of origin                    |                                                   |        |            |          |        |          |       |        |           |            |        |           |           |        |         |      |        |            |
| Europe                              | 527                                               | 227    | [87; 402]  | 423      | 0      | [0; 276] | 384   | 200    | [45; 490] | 95         | 39     | [12; 91]  | 57        | 16     | [0; 68] | 345  | 278    | [156; 423] |
| Eastern Mediterranean               | 152                                               | 89     | [20; 193]  | 63       | 0      | [0; 0]   | 122   | 51     | [3; 148]  | 35         | 14     | [0; 42]   | 37        | 0      | [0; 46] | 283  | 245    | [156; 356] |
| Africa                              | 155                                               | 60     | [13; 180]  | 96       | 0      | [0; 0]   | 121   | 24     | [0; 106]  | 36         | 8      | [0; 23]   | 31        | 0      | [0; 39] | 302  | 245    | [178; 356] |
| Other                               | 201                                               | 75     | [34; 187]  | 122      | 0      | [0; 0]   | 142   | 38     | [7; 110]  | 25         | 11     | [2; 33]   | 22        | 0      | [0; 24] | 271  | 223    | [178; 312] |
| Unknown/stateless                   | 114                                               | 63     | [6; 143]   | 71       | 0      | [0; 0]   | 140   | 24     | [0; 98]   | 26         | 10     | [0; 28]   | 32        | 0      | [0; 49] | 322  | 256    | [156; 334] |
| Language                            |                                                   |        |            |          |        |          |       |        |           |            |        |           |           |        |         |      |        |            |
| French                              | 201                                               | 73     | [0; 201]   | 126      | 0      | [0; 0]   | 154   | 41     | [0; 155]  | 38         | 11     | [0; 35]   | 36        | 0      | [0; 46] | 296  | 245    | [156; 356] |

|                             |      |     |             |     |   |          |     |     |            |     |    |           |    |    |          |     |     |            |
|-----------------------------|------|-----|-------------|-----|---|----------|-----|-----|------------|-----|----|-----------|----|----|----------|-----|-----|------------|
| German Italian or English   | 184  | 80  | [31; 199]   | 118 | 0 | [0; 0]   | 142 | 29  | [4; 124]   | 41  | 10 | [1; 31]   | 34 | 7  | [0; 44]  | 310 | 245 | [178; 378] |
| Other language              | 173  | 87  | [28; 213]   | 95  | 0 | [0; 0]   | 137 | 44  | [4; 138]   | 41  | 12 | [2; 37]   | 34 | 0  | [0; 41]  | 293 | 245 | [156; 356] |
| Region of residence         |      |     |             |     |   |          |     |     |            |     |    |           |    |    |          |     |     |            |
| Haut-Léman                  | 156  | 102 | [36; 216]   | 101 | 0 | [0; 0]   | 164 | 63  | [8; 178]   | 45  | 19 | [3; 51]   | 37 | 0  | [0; 45]  | 310 | 267 | [178; 378] |
| La Côte                     | 75   | 33  | [0; 73]     | 71  | 0 | [0; 0]   | 96  | 15  | [0; 94]    | 17  | 5  | [0; 18]   | 26 | 0  | [0; 36]  | 297 | 245 | [156; 378] |
| Lausanne                    | 243  | 98  | [22; 246]   | 135 | 0 | [0; 0]   | 157 | 40  | [0; 142]   | 47  | 10 | [0; 34]   | 34 | 0  | [0; 42]  | 274 | 223 | [156; 378] |
| Nord Broye                  | 155  | 78  | [29; 192]   | 93  | 0 | [0; 0]   | 129 | 41  | [4; 142]   | 32  | 13 | [2; 39]   | 41 | 8  | [0; 53]  | 345 | 289 | [200; 423] |
| Living in a group lodge     | 181  | 76  | [20; 197]   | 109 | 0 | [0; 0]   | 144 | 37  | [0; 140]   | 38  | 11 | [0; 34]   | 34 | 0  | [0; 43]  | 312 | 267 | [178; 378] |
| Not living in a group lodge | 253  | 130 | [46; 303]   | 150 | 0 | [0; 0]   | 158 | 72  | [9; 170]   | 56  | 21 | [4; 69]   | 39 | 0  | [0; 53]  | 135 | 111 | [67; 156]  |
| CHO                         | 400  | 230 | [138; 345]  | 167 | 0 | [0; 97]  | 251 | 144 | [82; 306]  | 106 | 82 | [34; 127] | 56 | 22 | [0; 78]  | 430 | 334 | [200; 456] |
| DB                          | 383  | 237 | [124; 383]  | 249 | 0 | [0; 149] | 330 | 141 | [60; 321]  | 152 | 95 | [37; 193] | 56 | 20 | [0; 79]  | 485 | 367 | [156; 646] |
| Pain                        | 207  | 96  | [29; 226]   | 126 | 0 | [0; 0]   | 164 | 51  | [4; 165]   | 43  | 14 | [2; 40]   | 39 | 7  | [0; 51]  | 314 | 267 | [178; 378] |
| HYP                         | 510  | 229 | [128; 406]  | 238 | 0 | [0; 130] | 313 | 135 | [45; 343]  | 111 | 62 | [20; 122] | 60 | 23 | [0; 87]  | 391 | 289 | [178; 445] |
| BAC                         | 255  | 124 | [36; 276]   | 168 | 0 | [0; 0]   | 191 | 66  | [7; 197]   | 54  | 22 | [5; 54]   | 47 | 12 | [0; 61]  | 333 | 267 | [178; 401] |
| TUM                         | 1530 | 708 | [242; 1494] | 598 | 0 | [0; 530] | 897 | 415 | [44; 1654] | 408 | 41 | [19; 250] | 78 | 63 | [0; 106] | 482 | 301 | [223; 601] |
| PSY                         | 271  | 130 | [39; 284]   | 183 | 0 | [0; 0]   | 225 | 86  | [13; 265]  | 56  | 24 | [5; 58]   | 49 | 13 | [0; 65]  | 362 | 312 | [200; 445] |

Source: own calculations based on data from the RESAMI network.

Notes: Costs refer to the mean costs per month over the first twelve months after arrival, IQR: inter-quartile range (distance between the 25th and 75th percentiles), USMi: Migrant Care Unit, CHO: high cholesterol, DM: Type 1 or 2 diabetes, Pain: pain/inflammation, HYP: hypertension, BAC: parasitosis or bacterial infections, TUM: tumor, PSY: mental disorder.
