# Supplementary material for: Detecting and describing heterogeneity in health care cost trajectories among asylum seekers
Source: PubMed Central journal article supplement (PMC9339203; doi:10.1186/s12913-022-08346-y), 2022-07-30
Supplement: 12913_2022_8346_MOESM3_ESM.pdf [file 12913_2022_8346_MOESM3_ESM.pdf]

# Additional file 3

**Panel A: Cluster 1**

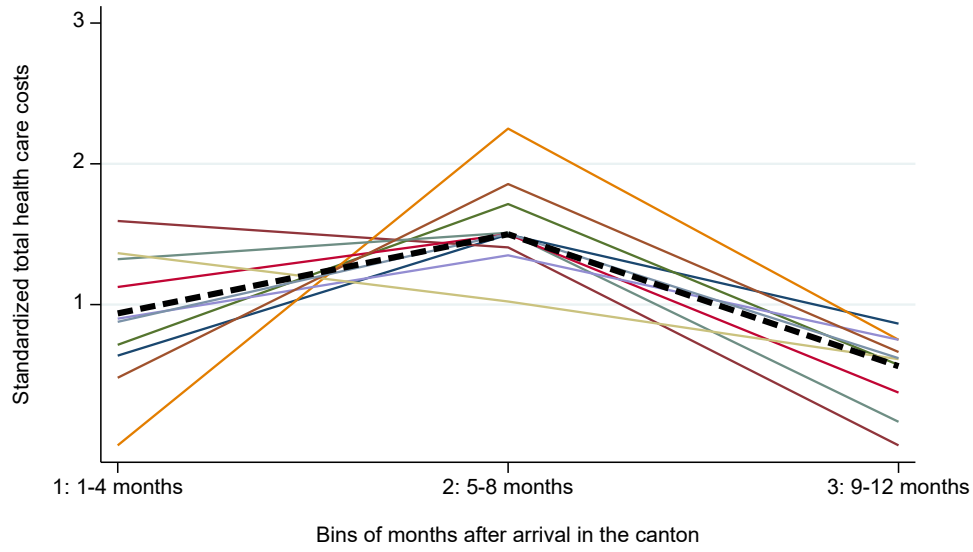

**Panel B: Cluster 2**

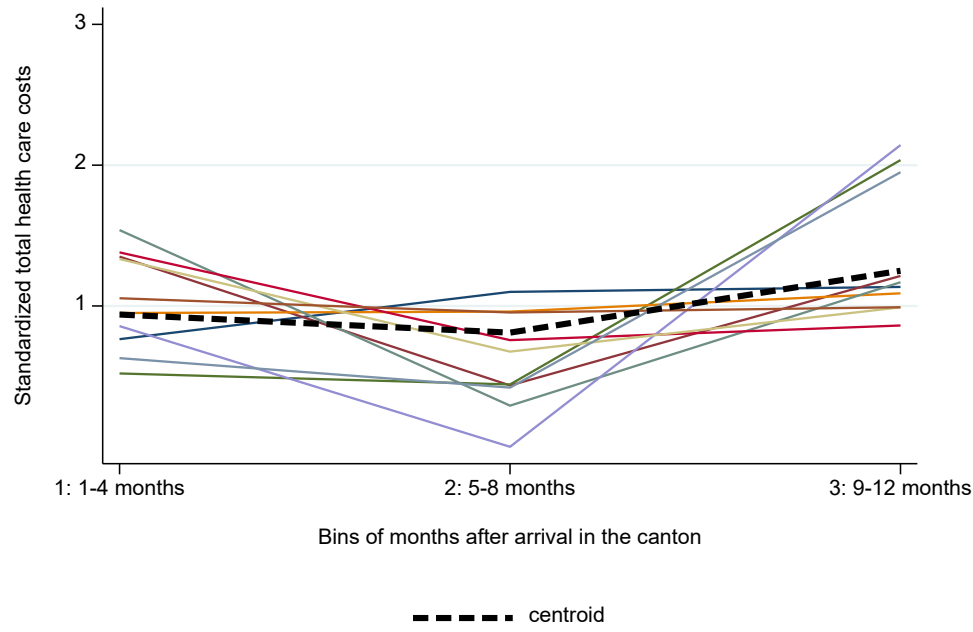

**Panel C: Cluster 3**

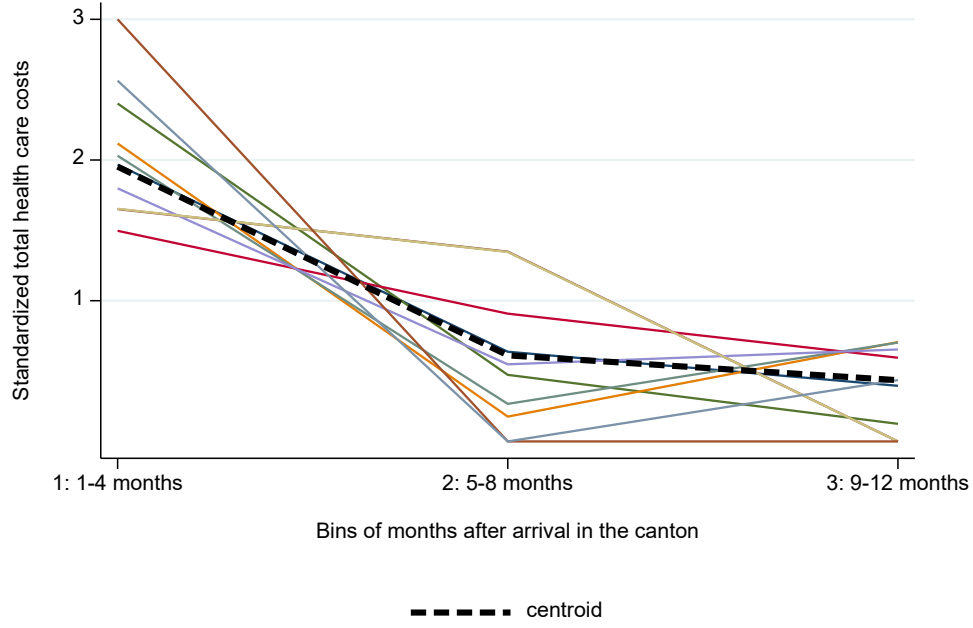

**Fig. S2** Shape of a random draw of trajectories per cluster
